# Supplementary material for: A Cu12 Metallacycle Assembled from Four C3-Symmetric Spin Frustrated Triangular Units
Source: MDPI journal article supplement (doi:10.3390/magnetochemistry9050122), 2023-05-06
Supplement: s1 [file s1]

Supplementary Material

# A Cu<sub>12</sub> Metallacycle Assembled from Four C<sub>3</sub>-Symmetric Spin Frustrated Triangular Units

Basharat Ali <sup>1,2</sup>, Grégoire David <sup>3</sup>, Frédéric Gendron <sup>3</sup>, Xiao-Lei Li <sup>1,4</sup>, Olivier Cador <sup>3</sup>, Winfried Plass <sup>5</sup>, Boris Le Guennic <sup>3,\*</sup> and Jinkui Tang <sup>1,2,\*</sup>

<sup>1</sup> State Key Laboratory of Rare Earth Resource Utilization, Changchun Institute of Applied Chemistry, Chinese Academy of Sciences, Changchun 130022, China; ali537@mail.ustc.edu.cn (B.A.); lixl@ciac.ac.cn (X.-L.L.)

<sup>2</sup> School of Applied Chemistry and Engineering, University of Science and Technology of China, Hefei 230026, China

<sup>3</sup> Univ Rennes, CNRS, ISCR (Institut des Sciences Chimiques de Rennes)—UMR 6226, F-35000 Rennes, France; gregoire.david@univ-rennes1.fr (G.D.); frederic.gendron@univ-rennes1.fr (F.G.); olivier.cador@univ-rennes1.fr (O.C.)

<sup>4</sup> Key Laboratory of Advanced Energy Materials Chemistry (Ministry of Education), College of Chemistry, Nankai University, Tianjin 300071, China

<sup>5</sup> Institut für Anorganische und Analytische Chemie, Friedrich-Schiller-Universität Jena, D-07743 Jena, Germany; sekr.plass@uni-jena.de

\* Correspondence: boris.leguennic@univ-rennes1.fr (B.L.G.); tang@ciac.ac.cn (J.T.)

## Contents:

S1. Crystallographic data & structure of ligand H<sub>5</sub>L·HCl

S2. Molecular structures

S3. Structural details of Cu<sub>12</sub>

S4. Coordination geometry

S5. Magnetic susceptibility measurement

S6. Theoretical calculations

**Citation:** Ali, B.; David, G.; Gendron, F.; Li, X.-L.; Cador, O.; Plass, W.; Le Guennic, B.; Tang, J. A Cu<sub>12</sub> Metallacycle Assembled from Four C<sub>3</sub>-Symmetric Spin Frustrated Triangular Units. *Magnetochemistry* **2023**, *9*, 122. <https://doi.org/10.3390/magnetochemistry9050122>

Academic Editor: Carlos J. Gómez García

Received: 10 April 2023

Revised: 26 April 2023

Accepted: 3 May 2023

Published: 6 May 2023

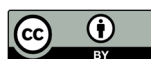

**Copyright:** © 2023 by the authors. Licensee MDPI, Basel, Switzerland. This article is an open access article distributed under the terms and conditions of the Creative Commons Attribution (CC BY) license (<https://creativecommons.org/licenses/by/4.0/>).

S1. Crystallographic data & structure of ligand H<sub>5</sub>L·HClTable S1. Crystal data and structure refinement parameters for Cu<sub>12</sub>.

| Compound                                       | Cu <sub>12</sub>                                                                   |
|------------------------------------------------|------------------------------------------------------------------------------------|
| Empirical formula                              | C <sub>168</sub> H <sub>140</sub> Cu <sub>12</sub> N <sub>52</sub> O <sub>12</sub> |
| Formula weight                                 | 3841.79                                                                            |
| Temperature [K]                                | 120.0                                                                              |
| Crystal system                                 | triclinic                                                                          |
| Space group (number)                           | $P\bar{1}$ (2)                                                                     |
| <i>a</i> [Å]                                   | 15.683(3)                                                                          |
| <i>b</i> [Å]                                   | 16.188(3)                                                                          |
| <i>c</i> [Å]                                   | 19.864(3)                                                                          |
| $\alpha$ [°]                                   | 102.157(5)                                                                         |
| $\beta$ [°]                                    | 92.572(6)                                                                          |
| $\gamma$ [°]                                   | 117.967(5)                                                                         |
| Volume [Å <sup>3</sup> ]                       | 4293.4(13)                                                                         |
| <i>Z</i>                                       | 1                                                                                  |
| $\rho_{\text{calc}}$ [gcm <sup>−3</sup> ]      | 1.486                                                                              |
| $\mu$ [mm <sup>−1</sup> ]                      | 1.528                                                                              |
| <i>F</i> (000)                                 | 1956                                                                               |
| Radiation                                      | MoK $\alpha$ ( $\lambda$ = 0.71073 Å)                                              |
| Reflections collected                          | 54021                                                                              |
| Independent reflections                        | 14660; $R_{\text{int}}$ = 0.1212, $R_{\text{sigma}}$ = 0.1126                      |
| Data / Restraints / Parameters                 | 14660/238/1075                                                                     |
| Goodness-of-fit on $F^2$                       | 1.042                                                                              |
| Final <i>R</i> indexes [ $I \geq 2\sigma(I)$ ] | $R_1$ = 0.1299, $wR_2$ = 0.3834                                                    |
| Final <i>R</i> indexes [all data]              | $R_1$ = 0.1685, $wR_2$ = 0.4134                                                    |
| CCDC number                                    | 2248078                                                                            |

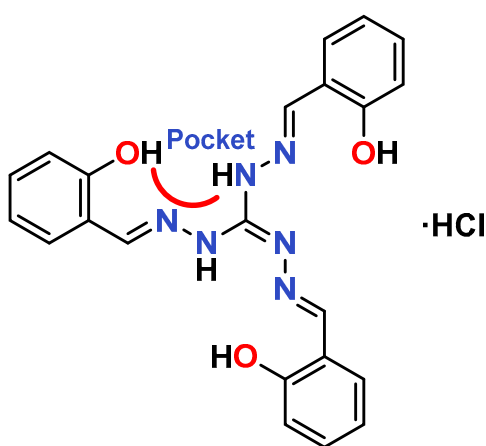Scheme S1. Structure of the ligand [H<sub>6</sub>L]Cl with three coordination pockets.

## S2. Molecular structures

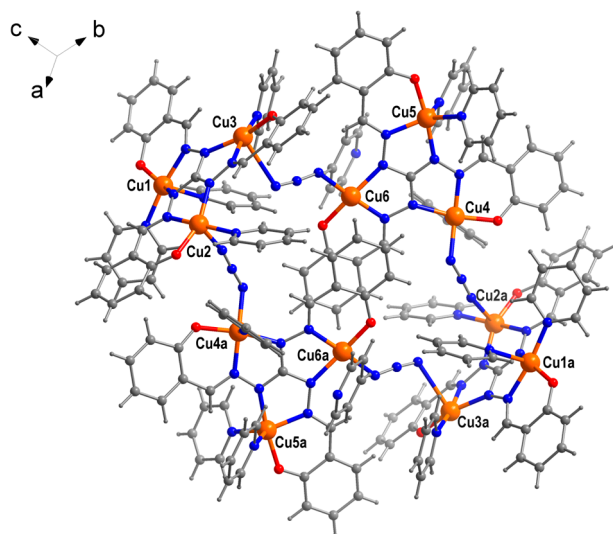

**Figure S1.** The molecular structure of **Cu<sub>12</sub>**, hydrogen atoms and two free pyridine molecules have been omitted for clarity. Color code: orange, Fe; red, O; blue, N; grey, C and light grey, H.

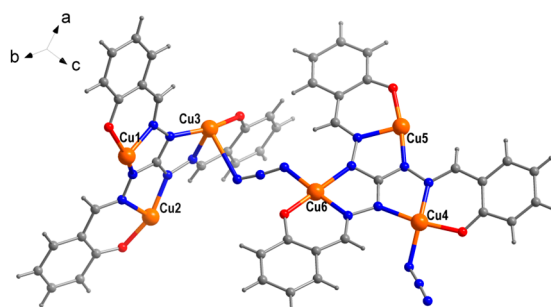

**Figure S2.** The asymmetric unit of **Cu<sub>12</sub>** in giving direction, the coordinated and free pyridine molecules have been omitted for clarity. Color code: orange, Fe; red, O; blue, N; grey, C and light grey, H.

### S3. Structural details of Cu<sub>12</sub>

**Table S2.** Selected bond lengths (Å) and angles (°) for Cu<sub>12</sub>.

|            |           |             |           |             |           |
|------------|-----------|-------------|-----------|-------------|-----------|
| Cu1-O2     | 1.918(10) | Cu3-O3      | 1.915(10) | Cu5-O5      | 1.887(12) |
| Cu1-N5     | 1.994(12) | Cu3-N2      | 1.978(12) | Cu5-N11     | 1.946(14) |
| Cu1-N6     | 1.976(12) | Cu3-N4      | 1.946(13) | Cu5-N15     | 1.982(13) |
| Cu1-N7     | 1.993(13) | Cu3-N12     | 2.003(14) | Cu5-N25     | 2.240(12) |
| Cu1-N14    | 2.342(14) | Cu4-O4      | 1.935(11) | Cu5-N26     | 2.097(9)  |
| Cu2-O1     | 1.918(11) | Cu4-N9      | 2.245(14) | Cu6-N13     | 1.937(13) |
| Cu2-N1     | 1.931(11) | Cu4-N16     | 1.987(13) | Cu6-O6      | 1.914(12) |
| Cu2-N3     | 1.989(12) | Cu4-N17     | 1.930(15) | Cu6-N18     | 2.015(14) |
| Cu2-N8     | 1.996(12) | Cu4-N20     | 2.016(15) | Cu6-N23     | 1.977(16) |
| O2-Cu1-N6  | 92.7(5)   | O3-Cu3-N4   | 93.2(5)   | O5-Cu5-N15  | 93.9(5)   |
| O2-Cu1-N7  | 151.9(5)  | O3-Cu3-N12  | 89.9(5)   | O5-Cu5-N25  | 90.0(6)   |
| O2-Cu1-N14 | 96.7(5)   | N2-Cu3-N12  | 99.4(5)   | O5-Cu5-N26  | 91.0(5)   |
| N5-Cu1-N14 | 88.3(5)   | N4-Cu3-N2   | 79.9(5)   | N11-Cu5-N15 | 79.7(5)   |
| N6-Cu1-N5  | 171.7(5)  | N4-Cu3-N12  | 171.0(5)  | N11-Cu5-N25 | 91.0(6)   |
| N6-Cu1-N7  | 79.2(5)   | O4-Cu4-N9   | 91.2(5)   | N11-Cu5-N26 | 94.5(5)   |
| N6-Cu1-N14 | 86.4(5)   | O4-Cu4-N16  | 169.0(5)  | N15-Cu5-N25 | 113.1(6)  |
| N7-Cu1-N5  | 96.6(5)   | O4-Cu4-N20  | 90.6(5)   | N15-Cu5-N26 | 132.2(6)  |
| N7-Cu1-N14 | 109.4(5)  | N16-Cu4-N9  | 94.8(5)   | N26-Cu5-N25 | 114.5(5)  |
| O1-Cu2-N1  | 92.4(5)   | N16-Cu4-N20 | 97.7(6)   | N13-Cu6-N18 | 80.5(5)   |
| O1-Cu2-N3  | 156.4(5)  | N17-Cu4-O4  | 90.8(5)   | N13-Cu6-N23 | 175.9(7)  |
| O1-Cu2-N8  | 93.2(5)   | N17-Cu4-N9  | 103.5(6)  | O6-Cu6-N13  | 93.1(6)   |
| N1-Cu2-N3  | 79.9(5)   | N17-Cu4-N16 | 78.9(6)   | O6-Cu6-N18  | 166.6(6)  |
| N1-Cu2-N8  | 170.5(5)  | N17-Cu4-N20 | 158.1(6)  | O6-Cu6-N23  | 90.4(6)   |
| N3-Cu2-N8  | 97.8(5)   | N20-Cu4-N9  | 98.3(6)   | N23-Cu6-N18 | 96.4(6)   |
| O3-Cu3-N2  | 162.7(5)  | O5-Cu5-N11  | 173.4(5)  |             |           |

### S4. Coordination geometry

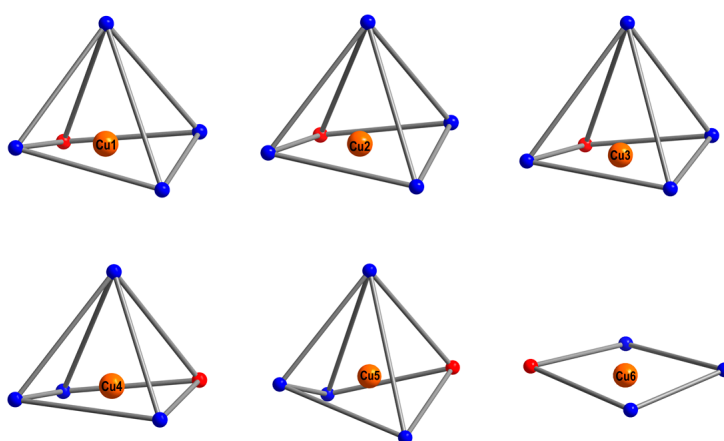

**Figure S3.** Representation of copper environment geometries for Cu<sub>12</sub>.

**Table S3.** Calculated geometries of Cu<sub>12</sub> by SHAPE 2.1 software<sup>1</sup>.

| Cu center | Pentagon ( $D_{5h}$ ) | Vacant octahedron ( $C_{4v}$ ) | Trigonal bipyramid ( $D_{3h}$ ) | Spherical square pyramid ( $C_{4v}$ ) | Johnson trigonal bipyramid J12 ( $D_{3h}$ ) |
|-----------|-----------------------|--------------------------------|---------------------------------|---------------------------------------|---------------------------------------------|
| Cu1       | 31.543                | 3.143                          | 2.252                           | 2.491                                 | 5.457                                       |
| Cu2       | 32.501                | 3.180                          | 2.599                           | 2.411                                 | 6.305                                       |
| Cu3       | 33.698                | 3.355                          | 3.575                           | 2.365                                 | 7.466                                       |
| Cu4       | 31.406                | 1.853                          | 3.751                           | 1.092                                 | 6.894                                       |
| Cu5       | 34.450                | 5.718                          | 0.865                           | 3.647                                 | 5.267                                       |
| Cu center | Square ( $D_{4h}$ )   | Tetrahedron ( $T_d$ )          | Seesaw ( $C_{2v}$ )             |                                       |                                             |
| Cu6       | 0.727                 | 27.843                         | 14.856                          |                                       |                                             |

### S5. Magnetic susceptibility measurement

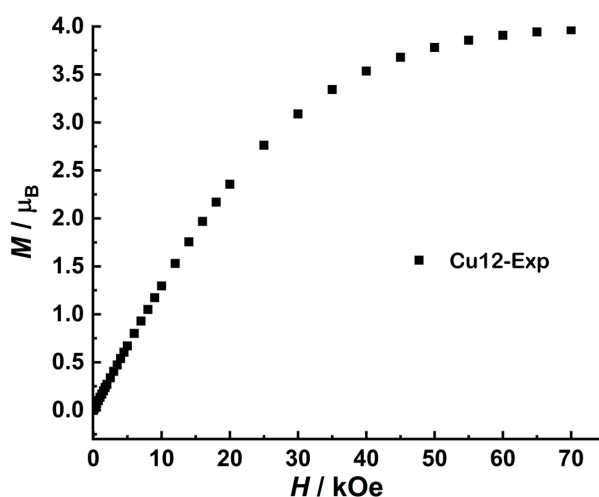**Figure S4.** Magnetization curve for Cu<sub>12</sub> at 2 K.

### S6. Theoretical calculations

**Table S4.** Principal magnetic coupling constants ( $J$  in cm<sup>-1</sup>) for Cu<sub>12</sub> calculated at the DFT level with the B3LYP, B3LYP\* and PBE0 functionals. The atom labels correspond to those used in Figure 1.

|                             | B3LYPPBE0B3LYP* |      |      |
|-----------------------------|-----------------|------|------|
| Cu1-Cu2 $J_{\text{intra}}$  | -330            | -275 | -403 |
| Cu1-Cu3 $J_{\text{intra}}$  | -305            | -256 | -371 |
| Cu2-Cu3 $J_{\text{intra}}$  | -337            | -282 | -412 |
| Cu4-Cu5 $J_{\text{intra}}$  | -236            | -200 | -286 |
| Cu4-Cu6 $J_{\text{intra}}$  | -389            | -320 | -485 |
| Cu5-Cu6 $J_{\text{intra}}$  | -205            | -170 | -250 |
| Cu2-Cu4a $J_{\text{azido}}$ | +3              | +3   | +3   |
| Cu3-Cu6 $J_{\text{azido}}$  | +7              | +6   | +8   |

**Table S5.** Calculated energy gap  $\Delta E_{ES1-GS}$  ( $\text{cm}^{-1}$ ) between the first excited state (ES1) and the ground state (GS), and the electronic g-factors for the ground state of the different metal centers in **Cu12**.

|      | $\Delta E_{ES1-GS}$ | $g_x$ | $g_y$ | $g_z$ |
|------|---------------------|-------|-------|-------|
| Cu1  | 11895               | 2.07  | 2.10  | 2.39  |
| Cu2  | 13195               | 2.07  | 2.09  | 2.37  |
| Cu3  | 13738               | 2.08  | 2.08  | 2.37  |
| Cu4  | 12202               | 2.06  | 2.10  | 2.39  |
| Cu5  | 11981               | 2.36  | 2.21  | 2.01  |
| Cu6  | 13914               | 2.07  | 2.08  | 2.38  |
| Cu7  | 11895               | 2.06  | 2.11  | 2.39  |
| Cu8  | 13195               | 2.06  | 2.10  | 2.37  |
| Cu9  | 13737               | 2.07  | 2.09  | 2.37  |
| Cu10 | 13910               | 2.07  | 2.08  | 2.37  |
| Cu11 | 11982               | 2.36  | 2.21  | 2.01  |
| Cu12 | 12202               | 2.07  | 2.10  | 2.39  |

**Table S6.** Relative energy (in  $\text{cm}^{-1}$ ) of the 20 lowest states of the spin Hamiltonian used in this work.

| States | B3LYP   | $J_{\text{azido}} (J_{\text{intra}} = -250 \text{ cm}^{-1})$ |                      |                      |                       |
|--------|---------|--------------------------------------------------------------|----------------------|----------------------|-----------------------|
|        |         | $0 \text{ cm}^{-1}$                                          | $-2 \text{ cm}^{-1}$ | $-5 \text{ cm}^{-1}$ | $-15 \text{ cm}^{-1}$ |
| 1      | 0.0000  | 0.0000                                                       | 0.0000               | 0.0000               | 0.0000                |
| 2      | 0.7806  | 0.0004                                                       | 0.4353               | 0.6063               | 1.4873                |
| 3      | 0.7923  | 0.0004                                                       | 0.9632               | 2.3698               | 6.8771                |
| 4      | 0.7970  | 0.0008                                                       | 0.9645               | 2.3713               | 6.8826                |
| 5      | 1.5166  | 0.0014                                                       | 0.9658               | 2.3730               | 6.8852                |
| 6      | 1.5182  | 0.0018                                                       | 1.0798               | 2.5398               | 7.4928                |
| 7      | 1.5212  | 0.0020                                                       | 1.0805               | 2.5408               | 7.4977                |
| 8      | 2.2897  | 0.0021                                                       | 1.0815               | 2.5443               | 7.5062                |
| 9      | 2.2924  | 0.0031                                                       | 1.1809               | 2.6920               | 7.6633                |
| 10     | 2.2969  | 0.0044                                                       | 1.1930               | 2.6933               | 7.6700                |
| 11     | 2.3083  | 0.0045                                                       | 1.1933               | 2.6973               | 7.6778                |
| 12     | 2.3086  | 0.0051                                                       | 1.1960               | 2.9665               | 8.9167                |
| 13     | 2.4105  | 0.0054                                                       | 1.3782               | 3.3076               | 9.8370                |
| 14     | 2.4136  | 0.0060                                                       | 1.3786               | 3.3719               | 9.9414                |
| 15     | 2.4151  | 0.0065                                                       | 1.3809               | 3.3722               | 10.0169               |
| 16     | 2.4246  | 0.0093                                                       | 1.3864               | 3.3762               | 10.0194               |
| 17     | 29.2526 | 0.1801                                                       | 1.4773               | 3.4374               | 10.0225               |
| 18     | 29.2541 | 0.1801                                                       | 1.4789               | 3.4877               | 10.2403               |
| 19     | 29.2543 | 0.1802                                                       | 1.4818               | 3.4910               | 10.2514               |
| 20     | 29.2585 | 0.1803                                                       | 1.5506               | 3.4923               | 10.2579               |

## References

1. D. Casanova, M. Lluell, P. Alemany and S. Alvarez, Chem. Eur. J., 2005, 11, 1479-1494.
